# Supplementary material for: Umbelliferone as an effective component of Rhodiola for protecting the cerebral microvascular endothelial barrier in cSVD
Source: Front Pharmacol. 2025 Mar 17;16:1552579. doi: 10.3389/fphar.2025.1552579 (PMC11955776; doi:10.3389/fphar.2025.1552579)
Supplement: Supplementary file 7 [file Table7.xlsx]

## Sheet: _FINAL_GO
Table S7. KEGG enrichment analysis
Description	GeneRatio	P.Value	Count
Pathways in cancer	0.465116	3.77e-24	20
Prostate cancer	0.209302	1.29e-14	9
MicroRNAs in cancer	0.162791	2.65e-07	7
PI3K-Akt signaling pathway	0.372093	1.83e-20	16
EGFR tyrosine kinase inhibitor resistance	0.232558	1.5e-17	10
Focal adhesion	0.255814	4.16e-15	11
Ras signaling pathway	0.255814	2.34e-14	11
Rap1 signaling pathway	0.232558	3.38e-13	10
MAPK signaling pathway	0.232558	9.57e-12	10
Central carbon metabolism in cancer	0.0930233	3.06e-06	4
JAK-STAT signaling pathway	0.116279	3.43e-06	5
Calcium signaling pathway	0.116279	2.3e-05	5
Phospholipase D signaling pathway	0.0930233	5.91e-05	4
Choline metabolism in cancer	0.0697674	0.000373256	3
Endocrine resistance	0.255814	1.26e-18	11
Proteoglycans in cancer	0.27907	8.93e-17	12
Bladder cancer	0.162791	1.55e-13	7
Prolactin signaling pathway	0.162791	8.02e-12	7
Chemical carcinogenesis - receptor activation	0.209302	1.62e-11	9
Estrogen signaling pathway	0.186047	1.98e-11	8
Relaxin signaling pathway	0.162791	6.29e-10	7
Thyroid hormone signaling pathway	0.116279	8.14e-07	5
Breast cancer	0.232558	9.24e-15	10
Melanoma	0.162791	9.83e-12	7
Human cytomegalovirus infection	0.209302	2.75e-11	9
Small cell lung cancer	0.162791	5.73e-11	7
Hepatocellular carcinoma	0.186047	9.6e-11	8
AGE-RAGE signaling pathway in diabetic complications	0.162791	1.04e-10	7
Human papillomavirus infection	0.209302	8.4e-10	9
Non-small cell lung cancer	0.139535	8.49e-10	6
Measles	0.162791	1.06e-09	7
Glioma	0.139535	1.09e-09	6
Pancreatic cancer	0.139535	1.18e-09	6
Kaposi sarcoma-associated herpesvirus infection	0.162791	1.08e-08	7
Alcoholic liver disease	0.139535	5.16e-08	6
Chronic myeloid leukemia	0.116279	7.93e-08	5
Hepatitis C	0.139535	9.38e-08	6
Endometrial cancer	0.0930233	1.43e-06	4
Gastric cancer	0.116279	2.27e-06	5
Cellular senescence	0.116279	2.85e-06	5
p53 signaling pathway	0.0930233	3.62e-06	4
Colorectal cancer	0.0930233	6.98e-06	4
Human T-cell leukemia virus 1 infection	0.116279	1.58e-05	5
Oxytocin signaling pathway	0.0930233	6.9e-05	4
Cushing syndrome	0.0930233	7.08e-05	4
Acute myeloid leukemia	0.0697674	0.000121233	3
Epstein-Barr virus infection	0.0930233	0.000196237	4
Viral carcinogenesis	0.0930233	0.000203764	4
Cell cycle	0.0697674	0.000776953	3
Apelin signaling pathway	0.0697674	0.00103209	3
Hippo signaling pathway	0.0697674	0.00146463	3
Tight junction	0.0697674	0.00180773	3
HIF-1 signaling pathway	0.186047	2.92e-12	8
Diabetic cardiomyopathy	0.186047	4.34e-10	8
FoxO signaling pathway	0.116279	1.21e-06	5
Longevity regulating pathway	0.0930233	8e-06	4
T cell receptor signaling pathway	0.0930233	1.48e-05	4
Insulin resistance	0.0930233	1.72e-05	4
AMPK signaling pathway	0.0930233	2.69e-05	4
Non-alcoholic fatty liver disease	0.0930233	7.08e-05	4
mTOR signaling pathway	0.0930233	7.25e-05	4
Longevity regulating pathway - multiple species	0.0697674	9.62e-05	3
B cell receptor signaling pathway	0.0697674	0.000220809	3
Neurotrophin signaling pathway	0.0697674	0.000658138	3
Dopaminergic synapse	0.0697674	0.000889	3
Insulin signaling pathway	0.0697674	0.000989822	3
Autophagy - animal	0.0697674	0.00107549	3
Signaling pathways regulating pluripotency of stem cells	0.0697674	0.00112003	3
Lipid and atherosclerosis	0.209302	1.83e-11	9
Fluid shear stress and atherosclerosis	0.162791	1.06e-09	7
Shigellosis	0.186047	2.04e-09	8
VEGF signaling pathway	0.116279	2.19e-08	5
Yersinia infection	0.139535	4.17e-08	6
ErbB signaling pathway	0.116279	1.39e-07	5
PD-L1 expression and PD-1 checkpoint pathway in cancer	0.116279	1.76e-07	5
NF-kappa B signaling pathway	0.116279	3.83e-07	5
Toxoplasmosis	0.116279	5.54e-07	5
Hepatitis B	0.116279	3.43e-06	5
Chemokine signaling pathway	0.116279	7.84e-06	5
Human immunodeficiency virus 1 infection	0.116279	1.27e-05	5
Chagas disease	0.0930233	1.37e-05	4
C-type lectin receptor signaling pathway	0.0930233	1.48e-05	4
TNF signaling pathway	0.0930233	1.99e-05	4
Apoptosis	0.0930233	4.25e-05	4
Influenza A	0.0930233	0.000103486	4
Tuberculosis	0.0930233	0.000126103	4
Neutrophil extracellular trap formation	0.0930233	0.000155218	4
Leishmaniasis	0.0697674	0.000183293	3
Coronavirus disease - COVID-19	0.0930233	0.000332338	4
Amoebiasis	0.0697674	0.000419699	3
Toll-like receptor signaling pathway	0.0697674	0.000444249	3
Growth hormone synthesis, secretion and action	0.0697674	0.000674345	3
NOD-like receptor signaling pathway	0.0697674	0.00230212	3
Pathogenic Escherichia coli infection	0.0697674	0.00279235	3
Herpes simplex virus 1 infection	0.0930233	0.00532889	4
Salmonella infection	0.0697674	0.00537403	3
Adherens junction	0.116279	5.62e-08	5
Chemical carcinogenesis - reactive oxygen species	0.139535	7.4e-07	6
Epithelial cell signaling in Helicobacter pylori infection	0.0930233	3.06e-06	4
Axon guidance	0.116279	6.04e-06	5
Bacterial invasion of epithelial cells	0.0697674	0.000183293	3
Regulation of actin cytoskeleton	0.0930233	0.000262418	4
Gap junction	0.0697674	0.000271984	3
GnRH signaling pathway	0.0697674	0.000320039	3
Endocytosis	0.0697674	0.00549427	3
IL-17 signaling pathway	0.116279	2.31e-07	5
Alzheimer disease	0.162791	1.11e-06	7
Pathways of neurodegeneration - multiple diseases	0.116279	0.000562299	5
Transcriptional misregulation in cancer	0.139535	3.17e-07	6
Leukocyte transendothelial migration	0.0697674	0.000580837	3
Ovarian steroidogenesis	0.0930233	8.51e-07	4
Regulation of lipolysis in adipocytes	0.0930233	1.34e-06	4
Serotonergic synapse	0.0930233	2.2e-05	4
Arachidonic acid metabolism	0.0697674	9.16e-05	3
Platelet activation	0.0697674	0.000741718	3
Tyrosine metabolism	0.0697674	1.86e-05	3
Rheumatoid arthritis	0.0697674	0.000320039	3
Progesterone-mediated oocyte maturation	0.0697674	0.000419699	3
Oocyte meiosis	0.0697674	0.000869655	3
Parkinson disease	0.0697674	0.00644789	3
